# Supplementary material for: High-Resolution Microstructure Characterization of Additively Manufactured X5CrNiCuNb17-4 Maraging Steel during Ex and In Situ Thermal Treatment
Source: MDPI journal article supplement (doi:10.3390/ma14247784), 2021-12-16
Supplement: s1 [file s1]

# Supplementary Materials: High-Resolution Microstructure Characterization of Additively Manufactured X5CrNiCuNb17-4 Maraging Steel during Ex and In Situ Thermal Treatment

Mihaela Albu <sup>1,\*</sup>, Bernd Panzirsch <sup>2</sup>, Hartmuth Schröttner <sup>3</sup>, Stefan Mitsche <sup>3</sup>, Klaus Reichmann <sup>4</sup>, Maria Cecilia Poletti <sup>5</sup> and Gerald Kothleitner <sup>1,3</sup>

<sup>1</sup> Graz Centre for Electron Microscopy, Steyrergasse 17, 8010 Graz, Austria; gerald.kothleitner@felmi-zfe.at

<sup>2</sup> ÖGI- Austrian Foundry Institute, Parkstraße 21, 8700 Leoben, Austria; bernd.panzirsch@ogi.at

<sup>3</sup> Institute of Electron Microscopy and Nanoanalysis, TU Graz, Steyrergasse 17, 8010 Graz, Austria; hartmuth.schroettner@felmi-zfe.at (H.S.); stefan.mitsche@felmi-zfe.at (S.M.)

<sup>4</sup> Institute for Chemistry and Technology of Materials, TU Graz, Stremayrgasse 9, 8010 Graz, Austria; k.reichmann@tugraz.at

<sup>5</sup> Institute of Materials Science, Joining and Forming, TU Graz, Kopernikusgasse 24, 8010 Graz, Austria; cecilia.poletti@tugraz.at

\* Correspondence: mihaela.albu@felmi-zfe.at; Tel.: +43-316-873-8348

**Citation:** Albu, M.; Panzirsch, B.; Schröttner, H.; Mitsche, S.; Reichmann, K.; Poletti, M.C.; Kothleitner, G. High-Resolution Microstructure Characterization of Additively Manufactured X5CrNiCuNb17-4 Maraging Steel during Ex and In Situ Thermal Treatment. *Materials* **2021**, *14*, 7784. <https://doi.org/10.3390/ma14247784>

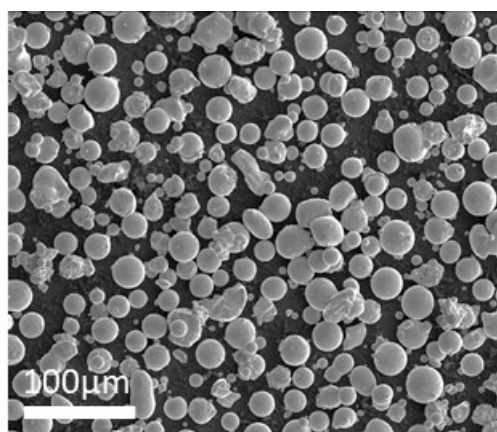

**Figure S1.** Overview SEM image of the as-received powder.

Academic Editor: Damon Kent

Received: 16 November 2021

Accepted: 13 December 2021

Published: 16 December 2021

**Publisher's Note:** MDPI stays neutral with regard to jurisdictional claims in published maps and institutional affiliations.

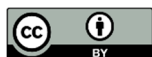

**Copyright:** © 2021 by the authors. Licensee MDPI, Basel, Switzerland. This article is an open access article distributed under the terms and conditions of the Creative Commons Attribution (CC BY) license (<http://creativecommons.org/licenses/by/4.0/>).

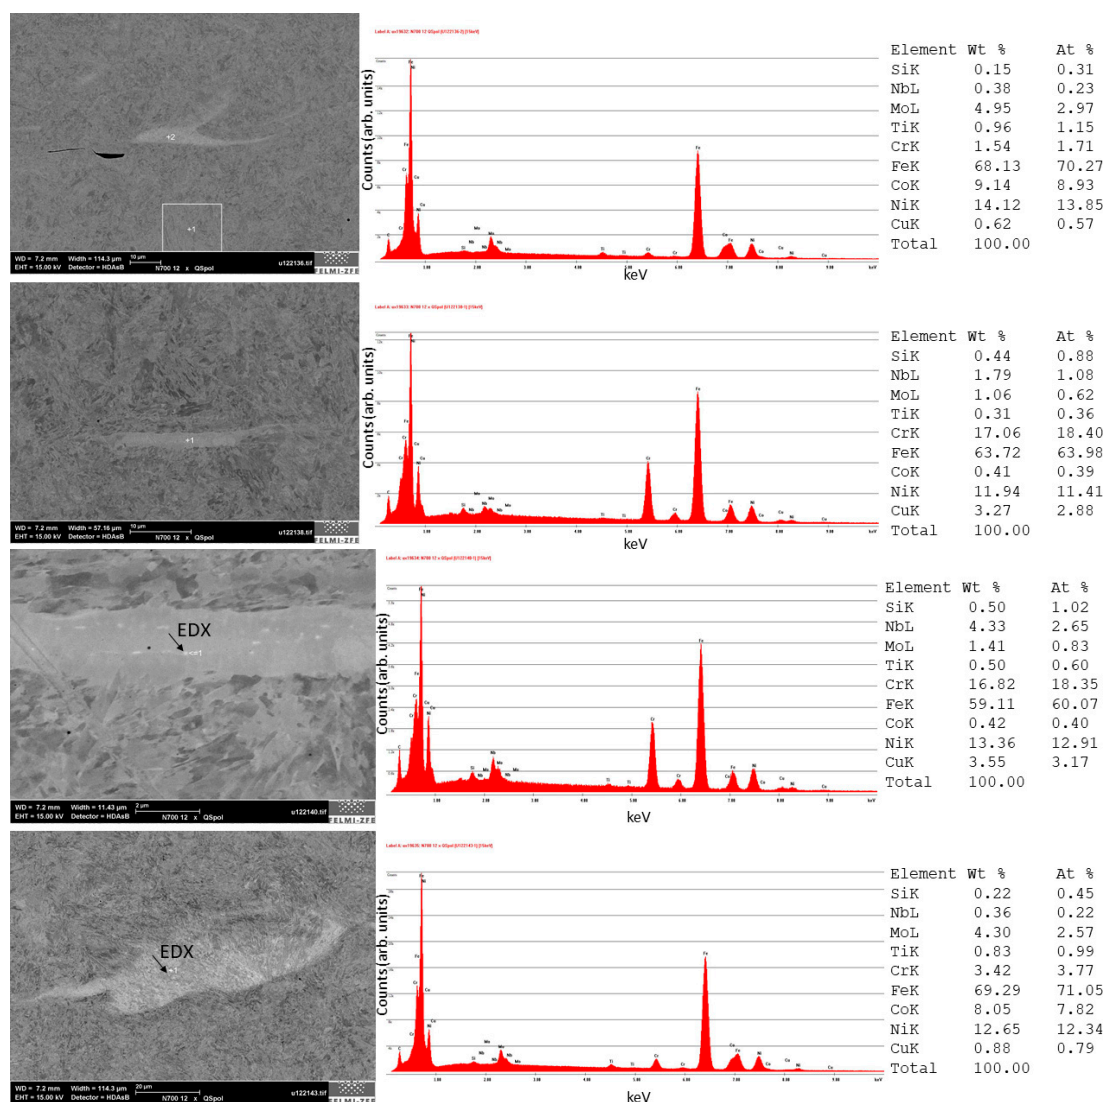

**Figure S2.** SEM images and EDX analysis of segregations at the melt pool interfaces and from a NbC particle found inside such a segregation for the as-built sample.

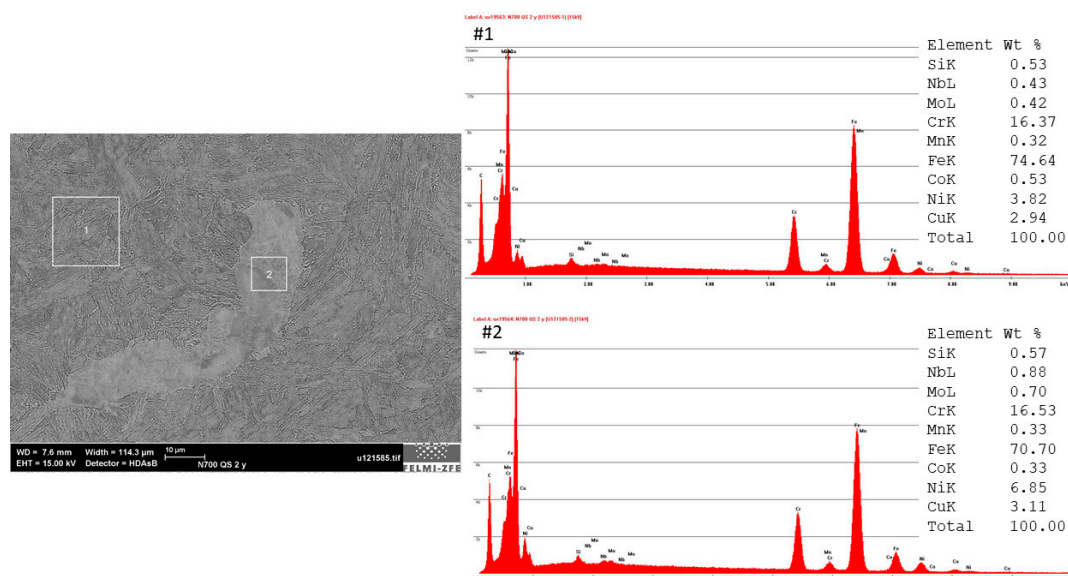

**Figure S3.** SEM images and EDX analysis of the matrix and segregations for the thermally treated sample.

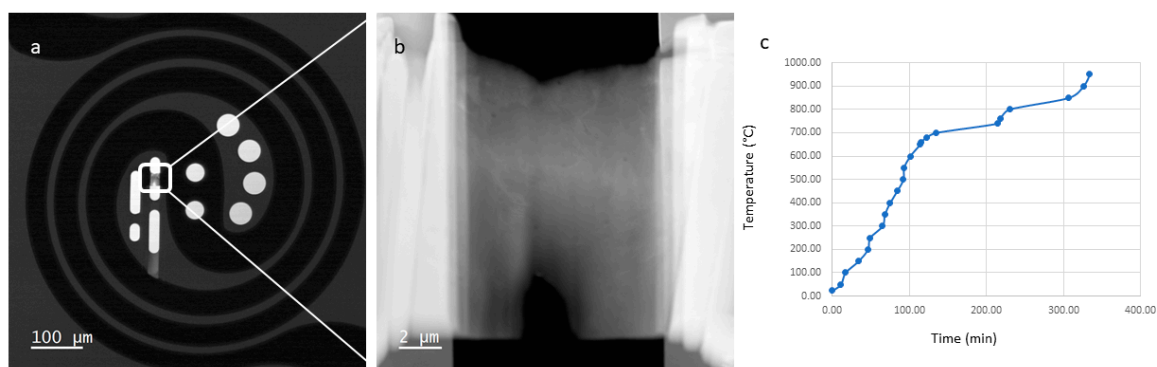

**Figure S4.** (a) heating chip with the FIB Lamella; (b) FIB lamella with thick edges; (c) heating ramp for *in situ* STEM.

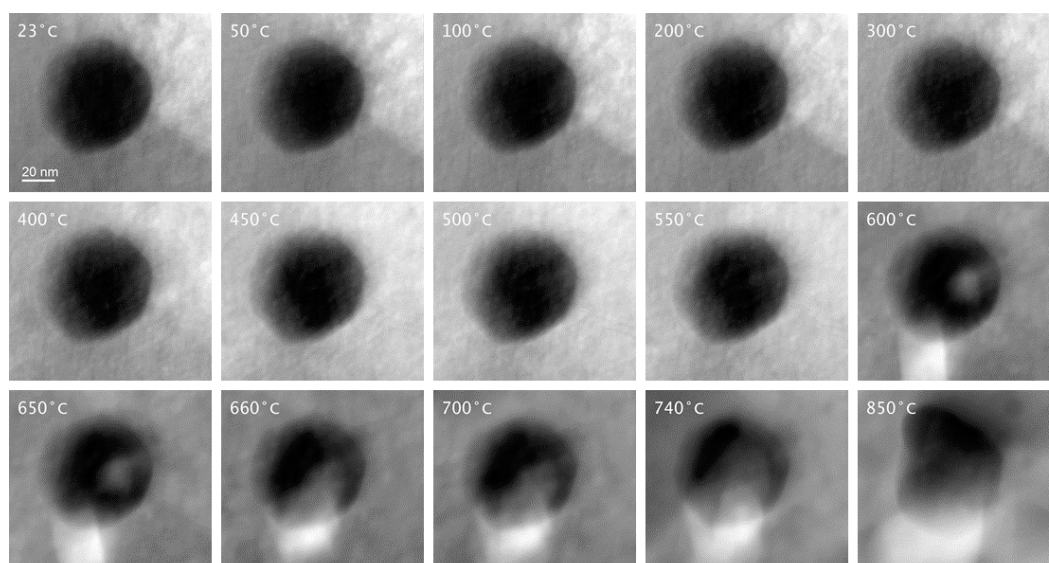

**Figure S5.** High resolution HAADF images of an oxide nanoparticle during *in situ* heating in STEM.
